# Supplementary figures and images for: Advax, a Delta Inulin Microparticle, Potentiates In-built Adjuvant Property of Co-administered Vaccines
Source: PubMed Central journal article supplement — eBioMedicine. 2016 Dec 1;15:127–36. doi: 10.1016/j.ebiom.2016.11.015 (PMC5233800; doi:10.1016/j.ebiom.2016.11.015), 2016-12-01

# Figure S1.

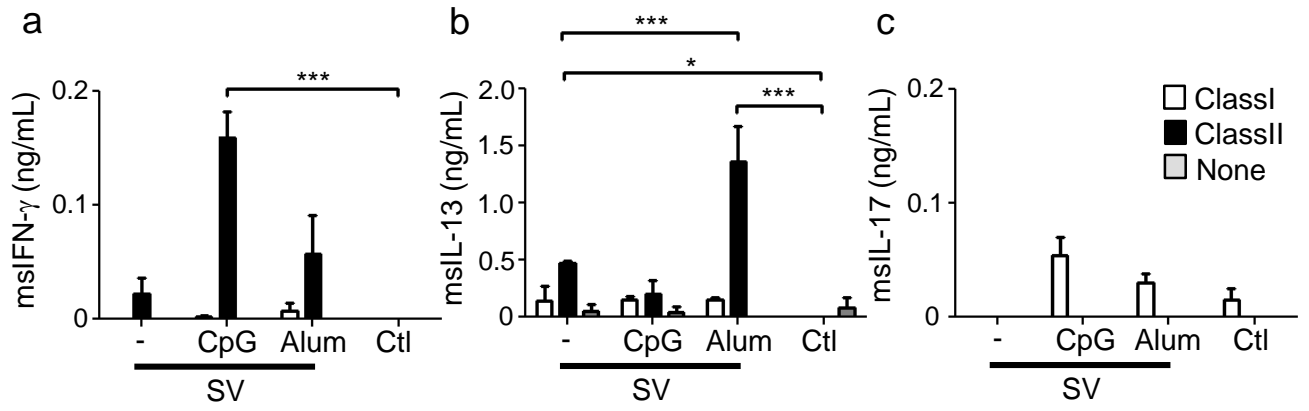

# Figure S2.

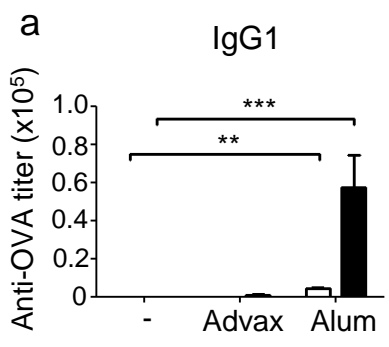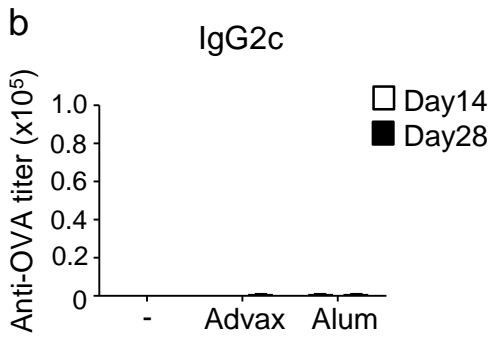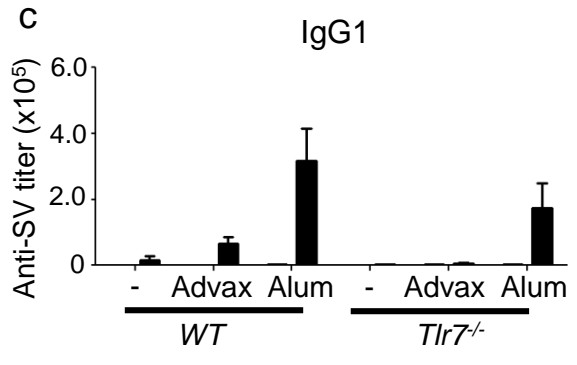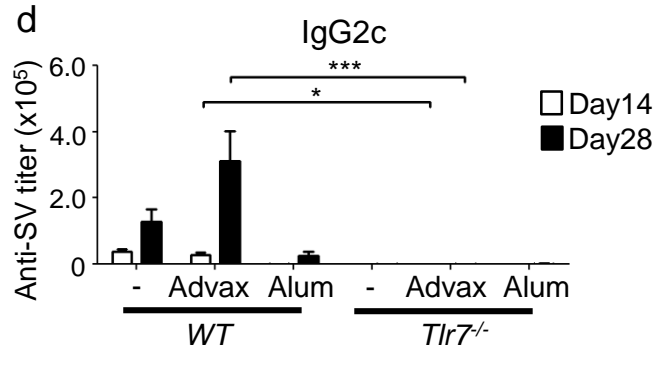

# Figure S3.

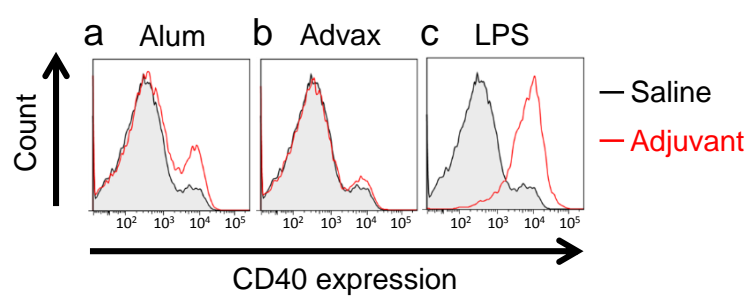

# Figure S4.

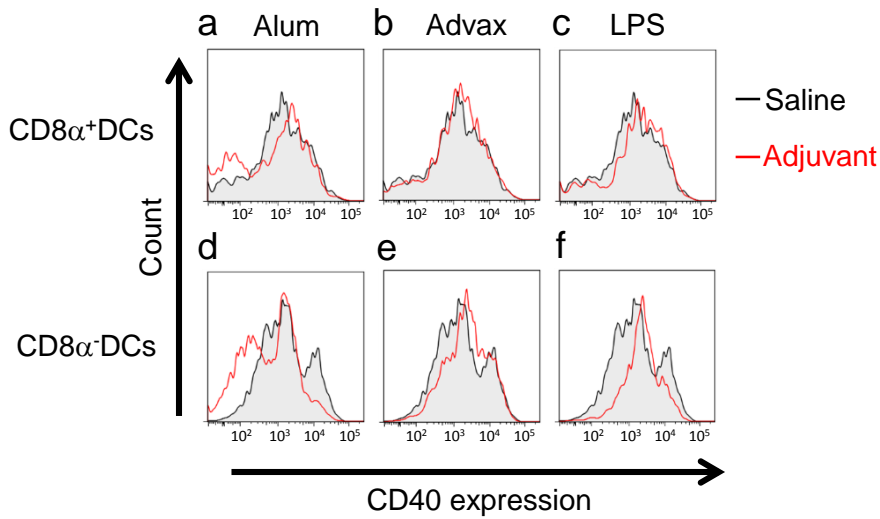



# Figure S6.

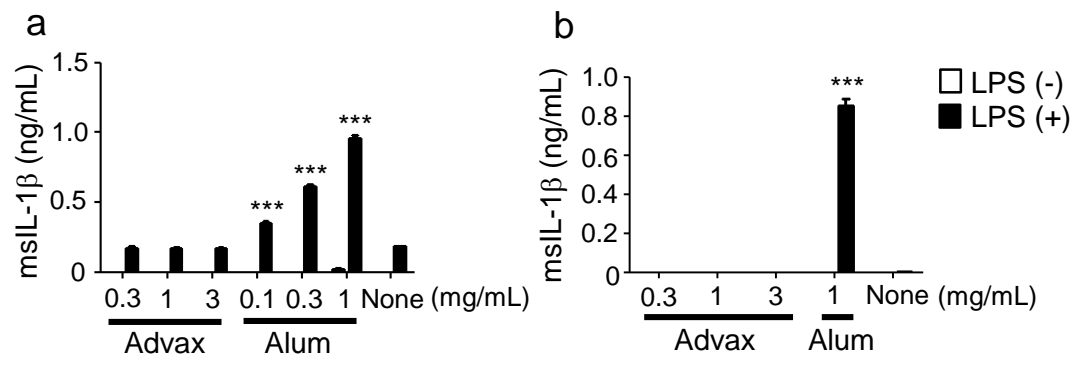

# Figure S7.

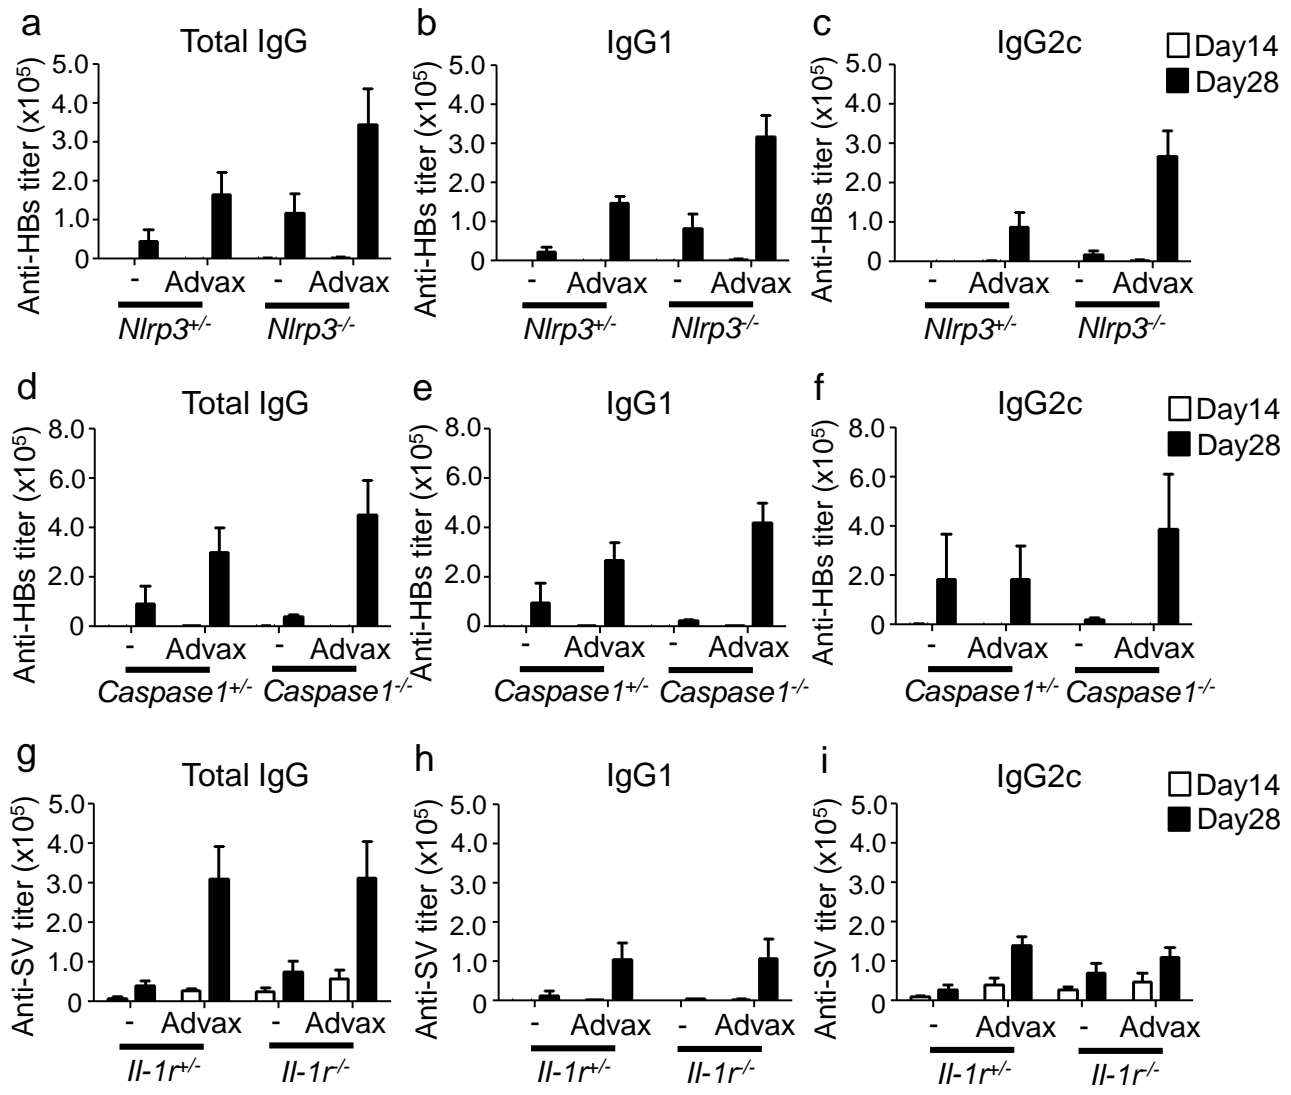

# Figure S8.

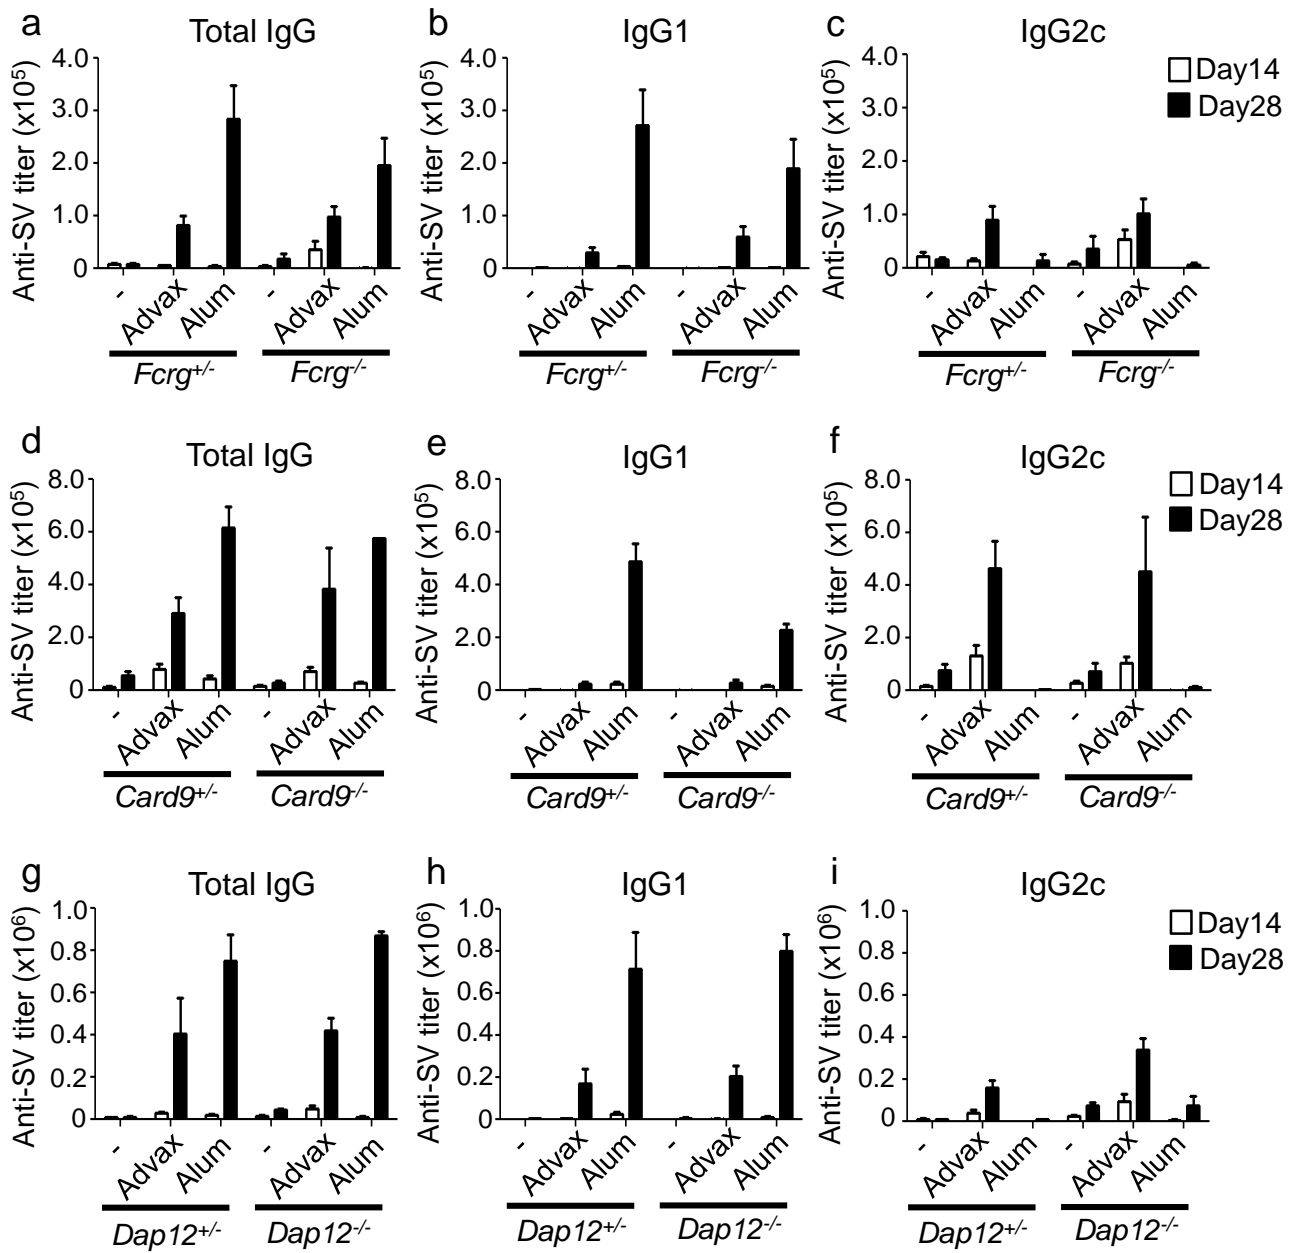



# Figure S9.

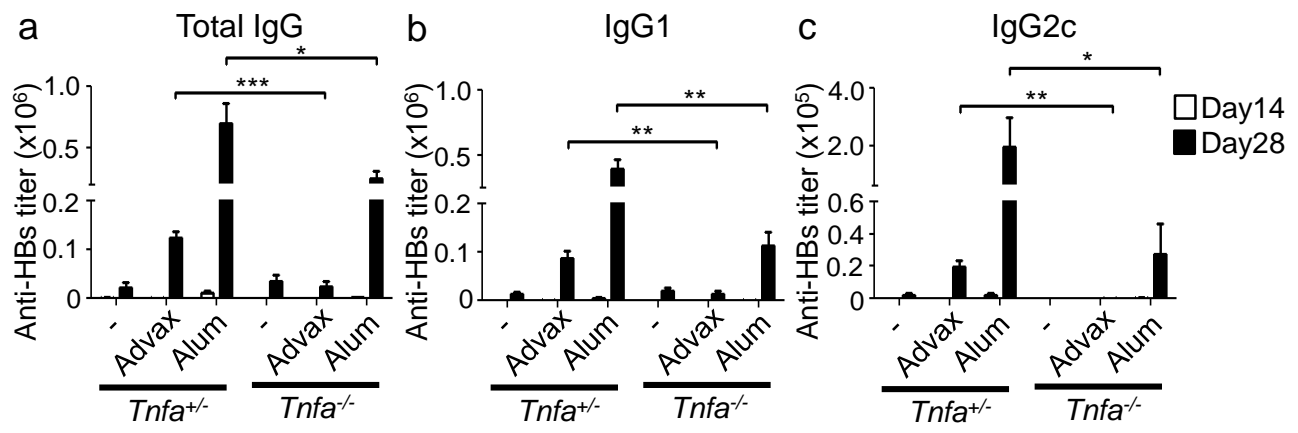

Supplement: mmc1.pdf [file mmc1.pdf]
